# Supplementary material
Source: publisher site journal article supplement (https://www.dovepress.com/article/136997)
Supplement: Supplementary file 1 [file get_supplementary_file.php]

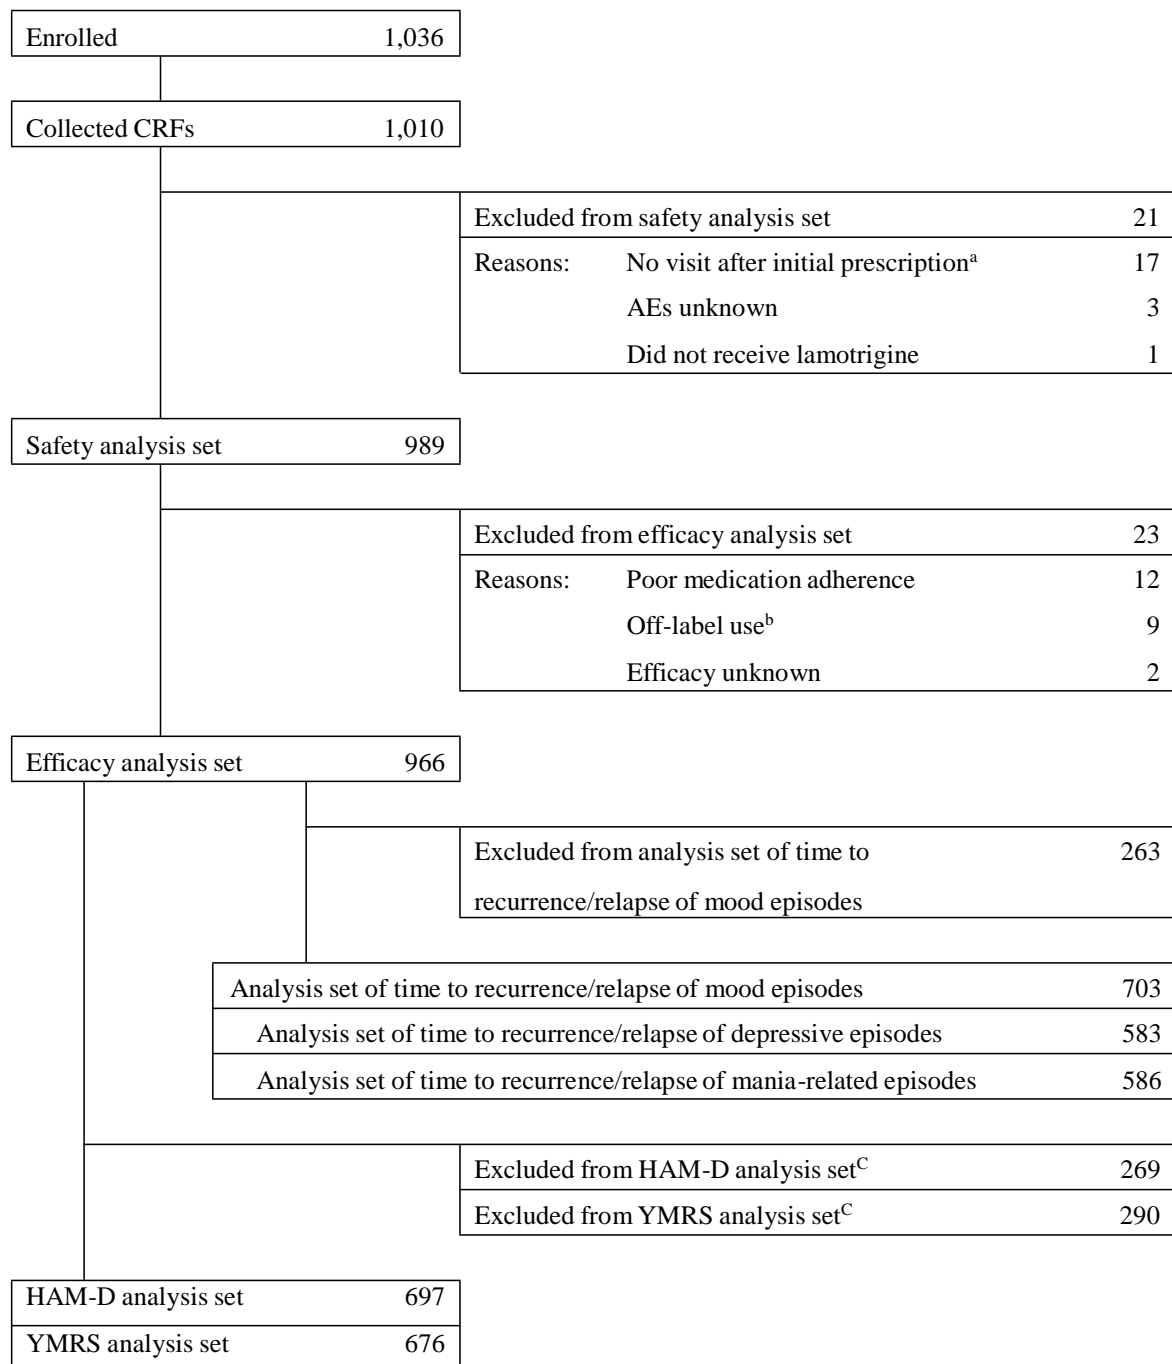

<sup>a</sup>Presence/absence of ADRs unknown because of no visit after initial prescription.

<sup>b</sup>Depression (n=2), affective disorder (n=1), schizophrenia (n=1), schizoaffective disorder (n=1), Cotard's syndrome (n=1), adjustment disorder (n=1), acute and transient psychotic disorder (n=1), organic systemic disorders due to late effects of cerebral infarction (n=1).

<sup>c</sup>Scores not obtained at two points: before and after lamotrigine treatment initiation

**Figure S1 Patient disposition**
