# Supplementary material
Source: publisher site journal article supplement (https://www.dovepress.com/article/136997)
Supplement: Supplementary file 2 [file get_supplementary_file.php]

**Table S1 List of medical institutions with IRB approval in conducting the study**

| Name of medical institution                                       |
|-------------------------------------------------------------------|
| Hokkaido University Hospital                                      |
| Sapporo Medical University Hospital                               |
| Akita University Hospital                                         |
| Akita City Hospital                                               |
| Juntendo University Koshigaya Hospital                            |
| Juntendo University Urayasu Hospital                              |
| Wakayama Medical University Hospital                              |
| Tokyo Women's Medical University Medical Center East              |
| Tokyo Women's Medical University Hospital                         |
| Tokyo Metropolitan Tama Medical Center                            |
| Kyorin University Hospital                                        |
| The Jikei University Daisan Hospital                              |
| Aichi Medical University Hospital                                 |
| Yamaguchi University Hospital                                     |
| National Center for Global Health and Medicine, Kohnodai Hospital |
| Chiba University Hospital                                         |
| Akashi City Hospital                                              |
| Hyogo College of Medicine Hospital                                |
| Tokyo Medical and Dental University,<br>Medical Hospital          |
| Showa University Karasuyama Hospital                              |
| Juntendo University Hospital                                      |
| Kochi Medical School Hospital                                     |
| Ehime University Hospital                                         |
| Tokushima University Hospital                                     |
| Fukuoka University Hospital                                       |
| University of the Ryukyus Hospital                                |
| Kyushu University Hospital                                        |
| Oita University Hospital                                          |
| Hirosaki University Hospital                                      |
| National Hospital Organization, Mito Medical Center               |
| Iwate Medical University Hospital                                 |
| Faculty of Medicine, University of Miyazaki Hospital              |
| Sendai City Hospital                                              |
| Shimane Prefectural Central Hospital                              |

Nara Medical University Hospital

---

Kobe University Hospital

---

Niigata University Medical & Dental Hospital

---

Tohoku Medical and Pharmaceutical University Hospital

---

Shinshu University Hospital

---

National Hospital Organization, Kanazawa Medical Center

---

National Hospital Organization, Sakakibara Hospital

---
