# Supplementary material
Source: publisher site journal article supplement (https://www.dovepress.com/article/136997)
Supplement: Supplementary file 3 [file get_supplementary_file.php]

**Table S2 Onset of adverse drug reactions (in 2% or more of patients, by SOC); safety analysis set**

|                                 |                     |
|---------------------------------|---------------------|
| Safety analysis set             | 989                 |
| No. of patients with ADRs       | 237                 |
| No. of ADRs                     | 354                 |
| Incidence of ADRs               | 24.0%               |
| Type of ADR <sup>a</sup>        | No. of patients (%) |
| <b>Psychiatric disorders</b>    | <b>36 (3.6)</b>     |
| Aggression                      | 2 (0.2)             |
| Agitation                       | 1 (0.1)             |
| Anger                           | 5 (0.5)             |
| Anxiety                         | 3 (0.3)             |
| Depersonalization               | 1 (0.1)             |
| Depression                      | 1 (0.1)             |
| Dissociative disorder           | 1 (0.1)             |
| Hypomania                       | 2 (0.2)             |
| Insomnia                        | 4 (0.4)             |
| Intentional self-injury         | 1 (0.1)             |
| Irritability                    | 10 (1.0)            |
| Mania                           | 3 (0.3)             |
| Panic attack                    | 1 (0.1)             |
| Suicidal ideation               | 4 (0.4)             |
| Depressive symptom              | 2 (0.2)             |
| BD                              | 1 (0.1)             |
| Abnormal behavior               | 1 (0.1)             |
| Somatic hallucination           | 1 (0.1)             |
| <b>Nervous system disorders</b> | <b>37 (3.7)</b>     |
| Akathisia                       | 1 (0.1)             |
| Disturbance in attention        | 2 (0.2)             |
| Dizziness                       | 7 (0.7)             |
| Dizziness postural              | 1 (0.1)             |
| Dysarthria                      | 1 (0.1)             |
| Headache                        | 7 (0.7)             |
| Hypersomnia                     | 3 (0.3)             |
| Hypoesthesia                    | 1 (0.1)             |
| Migraine                        | 1 (0.1)             |
| Neuralgia                       | 1 (0.1)             |
| Paresthesia                     | 1 (0.1)             |
| Sedation                        | 1 (0.1)             |

|                                               |                   |
|-----------------------------------------------|-------------------|
| Somnolence                                    | 13 (1.3)          |
| Tremor                                        | 5 (0.5)           |
| Cognitive disorder                            | 1 (0.1)           |
| <hr/>                                         |                   |
| <b>Gastrointestinal disorders</b>             | <b>23 (2.3)</b>   |
| Abdominal discomfort                          | 2 (0.2)           |
| Abdominal distension                          | 1 (0.1)           |
| Abdominal pain upper                          | 1 (0.1)           |
| Aphthous ulcer                                | 1 (0.1)           |
| Constipation                                  | 3 (0.3)           |
| Diarrhea                                      | 2 (0.2)           |
| Eructation                                    | 1 (0.1)           |
| Glossitis                                     | 1 (0.1)           |
| Glossodynia                                   | 2 (0.2)           |
| Nausea                                        | 4 (0.4)           |
| Oral pain                                     | 1 (0.1)           |
| Stomatitis                                    | 5 (0.5)           |
| Vomiting                                      | 1 (0.1)           |
| Lip erosion                                   | 1 (0.1)           |
| Hypoesthesia oral                             | 2 (0.2)           |
| Lip exfoliation                               | 1 (0.1)           |
| Mouth swelling                                | 1 (0.1)           |
| <hr/>                                         |                   |
| <b>Skin and subcutaneous tissue disorders</b> | <b>130 (13.1)</b> |
| Blister                                       | 1 (0.1)           |
| Chloasma                                      | 1 (0.1)           |
| Cold sweat                                    | 1 (0.1)           |
| Drug eruption                                 | 10 (1.0)          |
| Eczema                                        | 5 (0.5)           |
| Erythema                                      | 9 (0.9)           |
| Erythema multiforme                           | 2 (0.2)           |
| Pruritus                                      | 12 (1.2)          |
| Purpura                                       | 1 (0.1)           |
| Rash                                          | 90 (9.1)          |
| Rash macular                                  | 1 (0.1)           |
| Rash maculo-papular                           | 2 (0.2)           |
| Skin disorder                                 | 1 (0.1)           |
| Skin erosion                                  | 1 (0.1)           |
| Skin exfoliation                              | 1 (0.1)           |
| Stevens–Johnson syndrome                      | 2 (0.2)           |

|                                                       |         |
|-------------------------------------------------------|---------|
| Swelling face                                         | 1 (0.1) |
| Generalized erythema                                  | 1 (0.1) |
| Toxic skin eruption                                   | 1 (0.1) |
| Drug reaction with eosinophilia and systemic symptoms | 3 (0.3) |

---

**Note:** <sup>a</sup>MedDRA/J version 18.1 codes.

**Abbreviations:** ADR, adverse drug reaction; BD, bipolar disorder.
