# Supplementary material
Source: publisher site journal article supplement (https://www.dovepress.com/article/136997)
Supplement: Supplementary file 4 [file get_supplementary_file.php]

**Table S3 Type and time of onset of skin disorders (safety analysis set)**

| Type of skin disorders                                | No. of skin disorders | No. of days from lamotrigine treatment initiation to onset (days) |            |            |             |           | Unknown  |
|-------------------------------------------------------|-----------------------|-------------------------------------------------------------------|------------|------------|-------------|-----------|----------|
|                                                       |                       | ≤14                                                               | >14 to ≤28 | >28 to ≤56 | >56 to ≤168 | >168      |          |
| Blister                                               | 1                     | 0                                                                 | 1          | 0          | 0           | 0         | 0        |
| Chloasma                                              | 1                     | 0                                                                 | 0          | 0          | 0           | 1         | 0        |
| Cold sweat                                            | 1                     | 0                                                                 | 0          | 0          | 0           | 1         | 0        |
| Drug eruption                                         | 10                    | 0                                                                 | 6          | 4          | 0           | 0         | 0        |
| Eczema                                                | 5                     | 0                                                                 | 2          | 1          | 1           | 1         | 0        |
| Erythema                                              | 9                     | 4                                                                 | 1          | 2          | 2           | 0         | 0        |
| Erythema multiforme                                   | 2                     | 1                                                                 | 0          | 1          | 0           | 0         | 0        |
| Pruritus                                              | 12                    | 4                                                                 | 2          | 1          | 4           | 1         | 0        |
| Purpura                                               | 1                     | 1                                                                 | 0          | 0          | 0           | 0         | 0        |
| Rash                                                  | 94                    | 25                                                                | 20         | 22         | 16          | 9         | 2        |
| Rash macular                                          | 1                     | 0                                                                 | 0          | 1          | 0           | 0         | 0        |
| Rash maculo-papular                                   | 2                     | 1                                                                 | 1          | 0          | 0           | 0         | 0        |
| Skin disorder                                         | 1                     | 0                                                                 | 0          | 1          | 0           | 0         | 0        |
| Skin erosion                                          | 1                     | 0                                                                 | 0          | 1          | 0           | 0         | 0        |
| Skin exfoliation                                      | 1                     | 0                                                                 | 1          | 0          | 0           | 0         | 0        |
| Stevens–Johnson syndrome                              | 2                     | 0                                                                 | 1          | 1          | 0           | 0         | 0        |
| Swelling face                                         | 1                     | 0                                                                 | 0          | 0          | 1           | 0         | 0        |
| Generalized erythema                                  | 1                     | 0                                                                 | 0          | 1          | 0           | 0         | 0        |
| Toxic skin eruption                                   | 1                     | 1                                                                 | 0          | 0          | 0           | 0         | 0        |
| Drug reaction with eosinophilia and systemic symptoms | 3                     | 0                                                                 | 1          | 2          | 0           | 0         | 0        |
| <b>Total</b>                                          | <b>150</b>            | <b>37</b>                                                         | <b>36</b>  | <b>38</b>  | <b>24</b>   | <b>13</b> | <b>2</b> |

(MedDRA/J Version 18.1)
