# Supplementary material
Source: publisher site journal article supplement (https://www.dovepress.com/article/136997)
Supplement: Supplementary file 5 [file get_supplementary_file.php]

**Table S4 HAM-D score and change (HAM-D analysis set)**

| Results                                                                                 | Total patients       |                     |                       |
|-----------------------------------------------------------------------------------------|----------------------|---------------------|-----------------------|
|                                                                                         | Treatment initiation | 4 to 6 months after | 10 to 12 months after |
| No. of patients                                                                         | 697                  | 689                 | 536                   |
| Score (mean $\pm$ SD)                                                                   | 14.7 $\pm$ 8.26      | 8.3 $\pm$ 8.04      | 6.3 $\pm$ 7.14        |
| Change (mean $\pm$ SD)                                                                  | –                    | –6.4 $\pm$ 9.10     | –8.2 $\pm$ 8.96       |
| No. of patients with total score $\leq$ 7 points                                        | 147                  | 398                 | 361                   |
| Percentage of patients with total score $\leq$ 7 points relative to no. of patients (%) | 21.1                 | 57.8                | 67.4                  |
