# Supplementary material
Source: publisher site journal article supplement (https://www.dovepress.com/article/136997)
Supplement: Supplementary file 6 [file get_supplementary_file.php]

**Table S5 YMRS score and change (YMRS analysis set)**

| Results                                                                                  | Total patients       |                     |                       |
|------------------------------------------------------------------------------------------|----------------------|---------------------|-----------------------|
|                                                                                          | Treatment initiation | 4 to 6 months after | 10 to 12 months after |
| No. of patients                                                                          | 676                  | 674                 | 514                   |
| Score (mean $\pm$ SD)                                                                    | 3.8 $\pm$ 6.35       | 2.7 $\pm$ 5.72      | 1.7 $\pm$ 4.24        |
| Change (mean $\pm$ SD)                                                                   | –                    | –1.1 $\pm$ 6.38     | –1.8 $\pm$ 5.87       |
| No. of patients with total score $\leq$ 13 points                                        | 615                  | 637                 | 500                   |
| Percentage of patients with total score $\leq$ 13 points relative to no. of patients (%) | 91.0                 | 94.5                | 97.3                  |
